# Supplementary material for: Association of anti-TNF-α treatment with gut microbiota of patients with ankylosing spondylitis
Source: PubMed Central journal article supplement — Pharmacogenet Genomics. 2022 Jun 12;32(7):247–56. doi: 10.1097/FPC.0000000000000468 (PMC9351697; doi:10.1097/fpc.0000000000000468), 2022-06-12

Supplementary Figure 1: Rarefaction curve of all samples

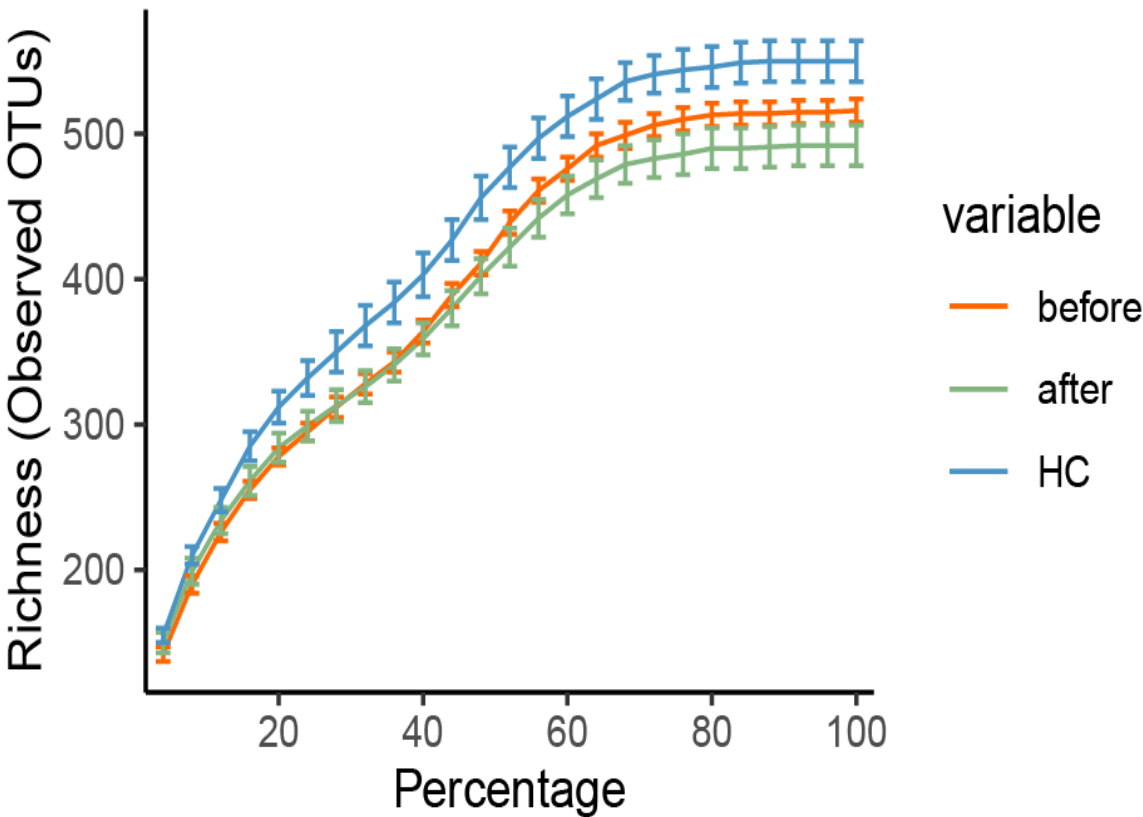

**Supplementary Figure 2:** Relative abundance of unique bacteria and their correlation with disease activity.

(A and B) Relative abundance of Bacilli and Haemophilus in the three groups. Spearman's rank correlations between the relative abundance of each bacterium with BASDAI (C and D) and CRP score (E and F).

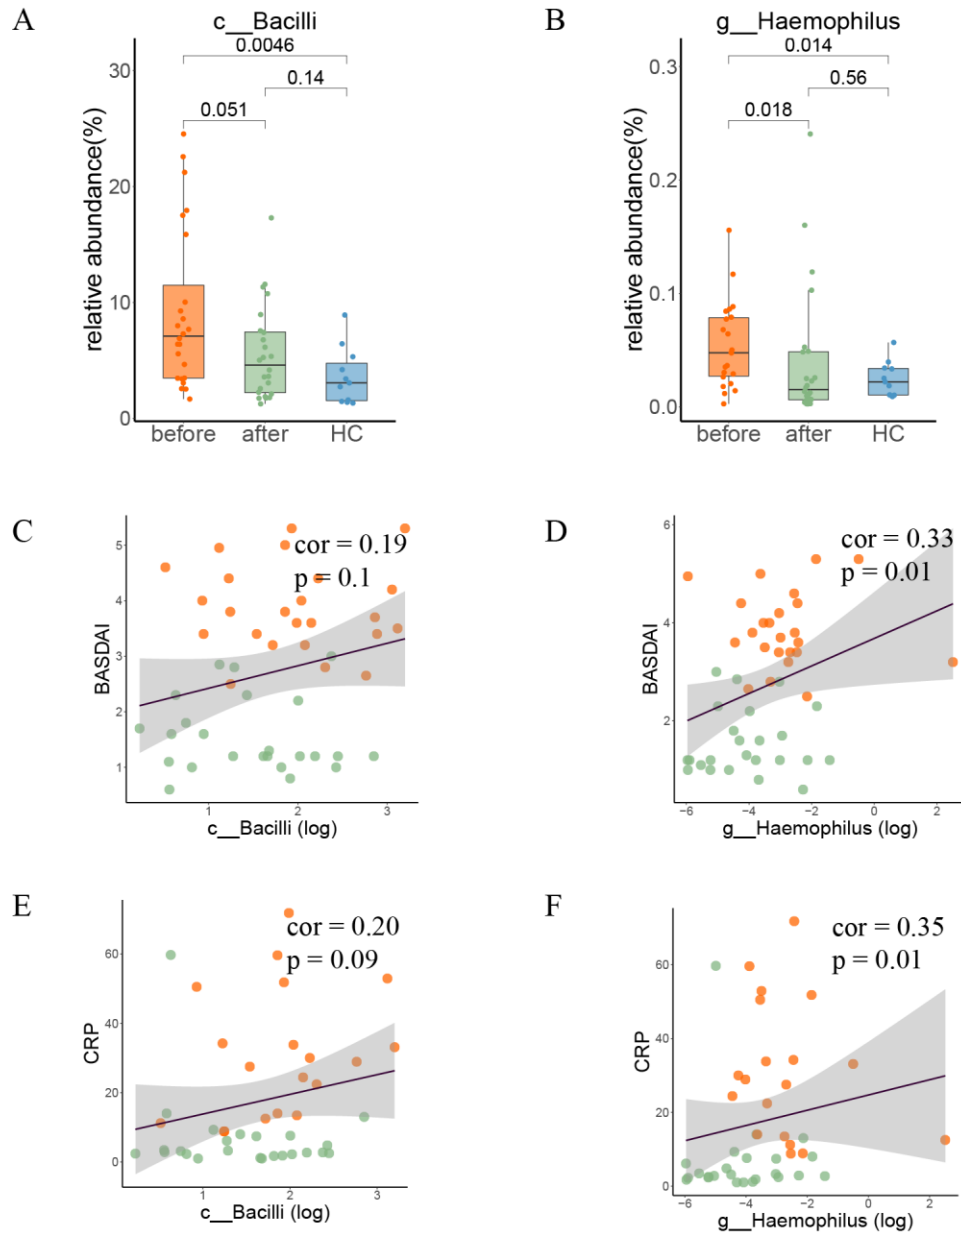

Supplementary Figure 3: Relative abundance of the Negativicutes class in the three groups

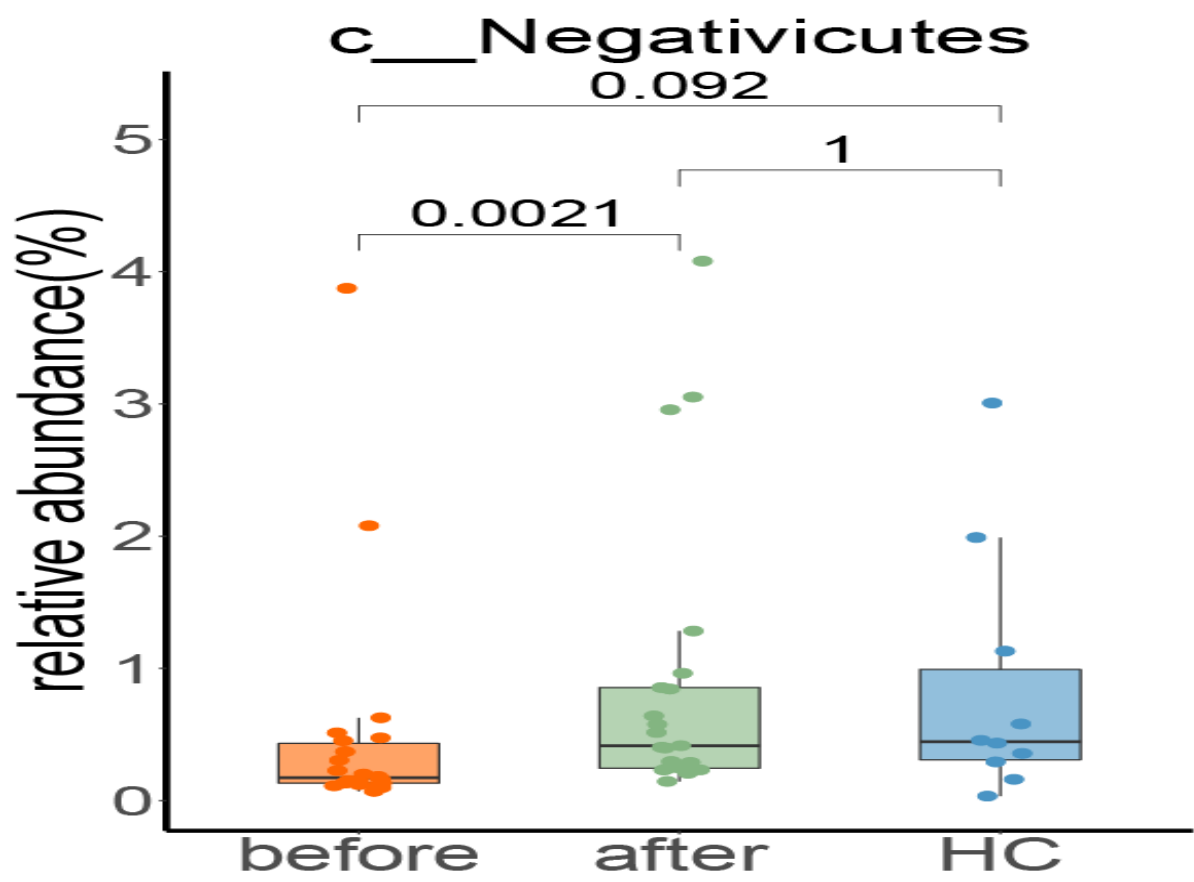

Supplement: pgen-32-247-s002.pdf [file pgen-32-247-s002.pdf]
